# Supplementary material for: Complexity in Biogeochemical Models: Consequences for the Biological Carbon Pump
Source: Copernicus journal article supplement (doi:10.5194/egusphere-2025-6505), 2026-01-13
Supplement: Supplementary file 1 [file egusphere-2025-6505-supplement.pdf]

# Supporting information for ‘Complexity in Biogeochemical Models: Consequences for the Biological Carbon Pump’

Jonathan Rogerson<sup>1\*</sup>, Alessandro Tagliabue<sup>2</sup>, Agathe Nguyen<sup>1</sup>, Marcello Vichi<sup>3,4</sup>, Lewis Wrightson<sup>2</sup>, Prima Anugerahanti<sup>2,5</sup>, Olivier Aumont<sup>6</sup> & Marion Gehlen<sup>1</sup>

<sup>1</sup>Laboratoire des Sciences du Climat et de l'Environnement, LSCE/IPSL, CEA-CNRS-UVSQ, Université Paris-Saclay, Gif-sur-Yvette, FR. <sup>2</sup>Department of Earth Ocean, and Ecological Sciences, School of Environmental Sciences, University of Liverpool, Liverpool, UK. <sup>3</sup>Department of Oceanography, University of Cape Town, Cape Town, RSA. <sup>4</sup>Marine and Antarctic Research centre for the Innovation and Sustainability (MARIS), Cape Town, RSA. <sup>5</sup>National Oceanography Centre, Liverpool, UK. <sup>6</sup>Sorbonne Université, CNRS/IRD/MNH, LOCEAN-IPSL, Paris, FR.

\*Corresponding author: Jonathan Rogerson: [jonathan.rogerson@lsce.ipsl.fr](mailto:jonathan.rogerson@lsce.ipsl.fr)

## Introduction

This supplementary section provides additional details and supporting analyses related to the main manuscript. It includes the following:

- S1 - Regional Carbon Cycle Assessment and Processes (RECCAP2) biomes
- S2 - Different remote-sensing NPP algorithms
- S3 - Different remote-sensing export production algorithms
- S4 - Export production equations and references
- S5 - Ensemble mean NPP and  $C_{exp}$  of PISCES and remote-sensing
- S6 - Phytoplankton biomass percentage contribution in Quota-based configurations
- S7 - Zooplankton dynamics
- S8 - Skill assessment of PISCES configurations versus ensemble mean of remote-sensing NPP and  $C_{exp}$ .

## References

### S1 Regional Carbon Cycle Assessment and Processes (RECCAP2) biomes

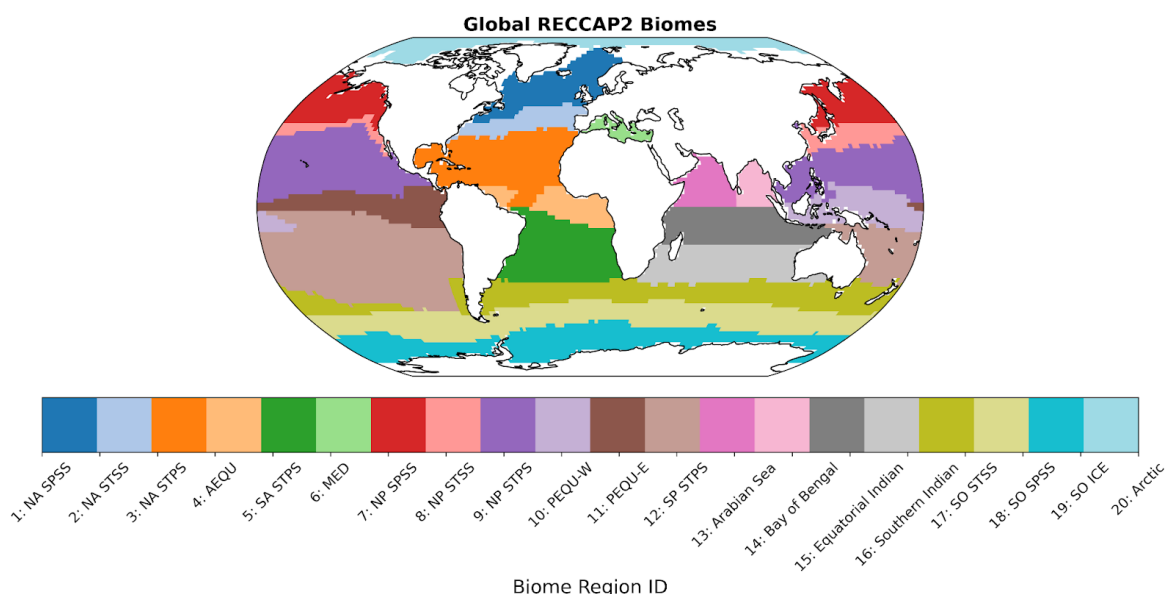

Figure S1: RECCAP2 biomes, based on Fay and Mckinley (2014)

**Different remote-sensing NPP algorithms**

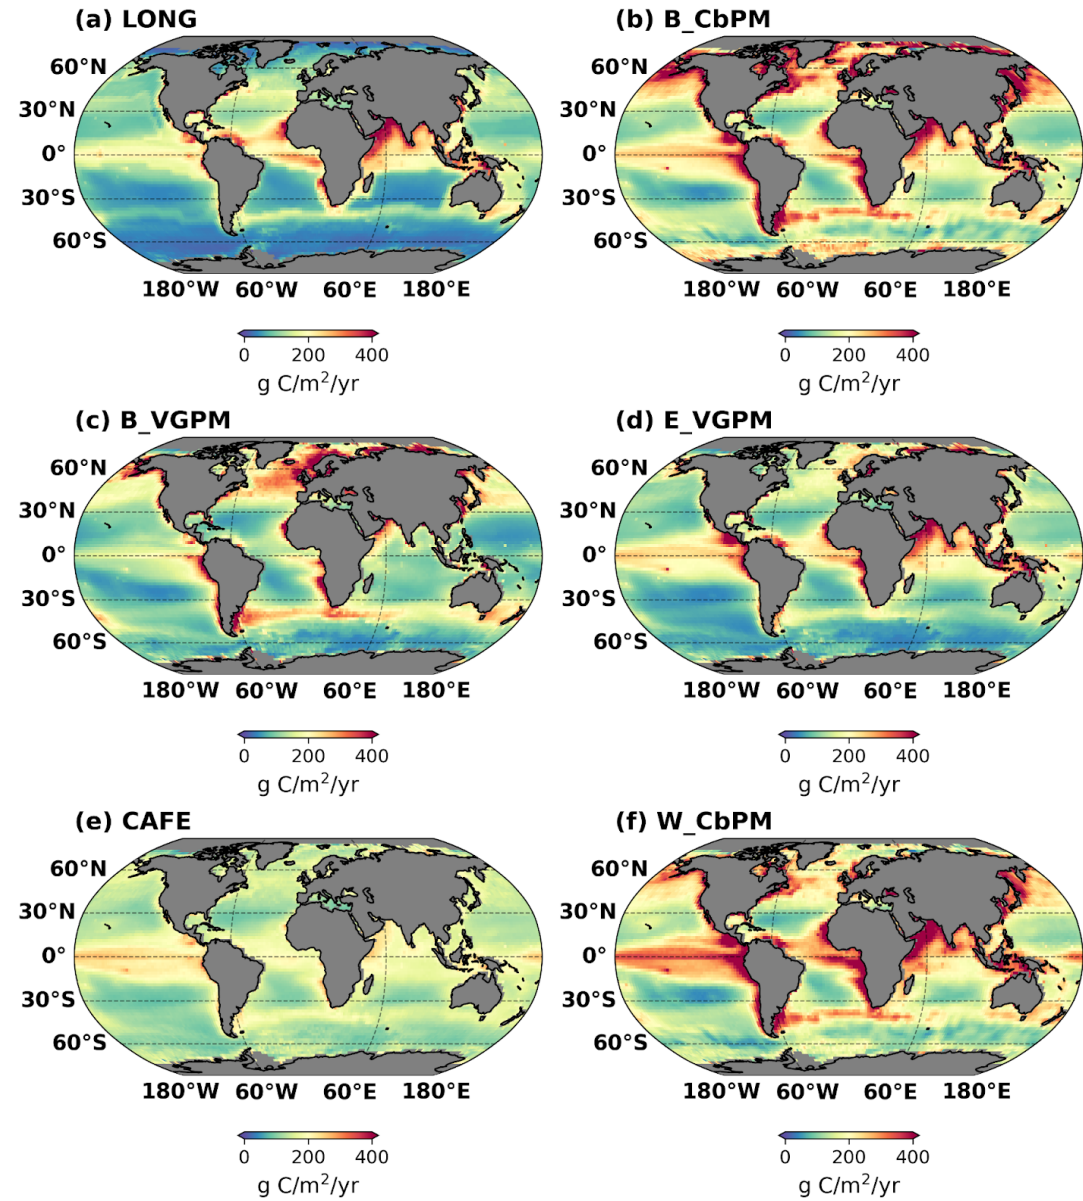

Figure S2: Mean (1998-2005) of different NPP algorithms.

Different remote-sensing export production algorithms

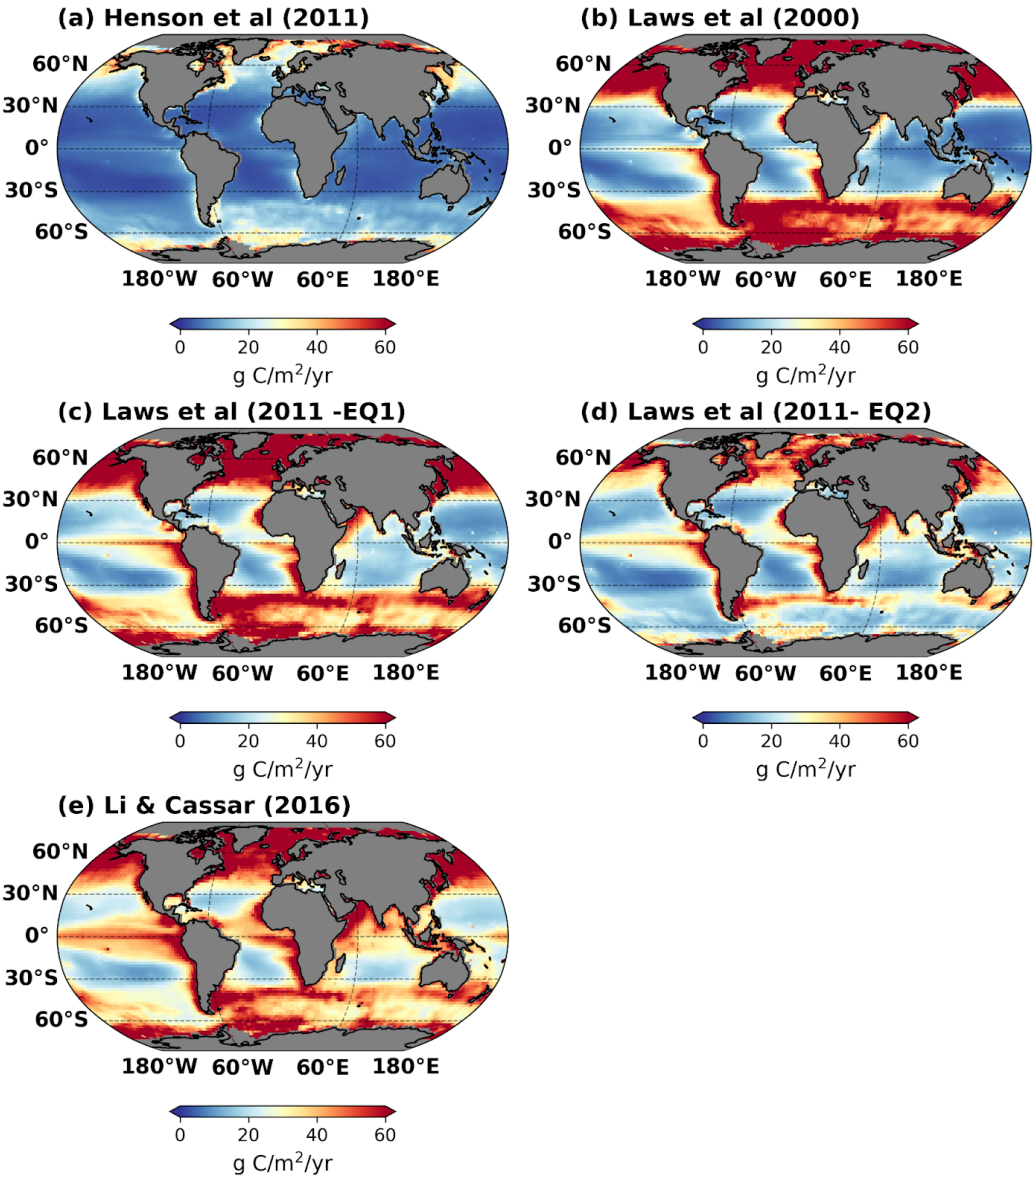

Figure S3: Mean (1998-2005) of different export production algorithms

## Export production equations and references

Table S1: Summary of equations used to compute export production (EP). Both NPP and EP are expressed in units of  $\text{mg C m}^{-2} \text{ day}^{-1}$  and sea surface temperature (SST) in  $^{\circ}\text{C}$ . The equations are written as they are shown in Jönsson et al. (2023).

| Reference                    | Equation                                                               |
|------------------------------|------------------------------------------------------------------------|
| Laws et al. (2000)           | $EP = NPP \cdot (0.62 - 0.02 SST)$                                     |
| Henson et al. (2011)         | $EP = NPP \cdot 0.23e^{-0.08 SST}$                                     |
| Laws et al. (2011) - Eq. (1) | $EP = NPP \cdot \frac{(0.5857 - 0.0165 SST) \cdot NPP}{51.7 + NPP}$    |
| Laws et al. (2011) - Eq. (2) | $EP = NPP \cdot 0.04756(0.78 - \frac{0.43 SST}{30}) \cdot NPP^{0.307}$ |
| Li and Cassar (2016)         | $EP = \frac{8.57 \cdot NPP}{17.9 + SST}$                               |

## Ensemble mean NPP and $C_{\text{exp}}$ of PISCES and remote-sensing

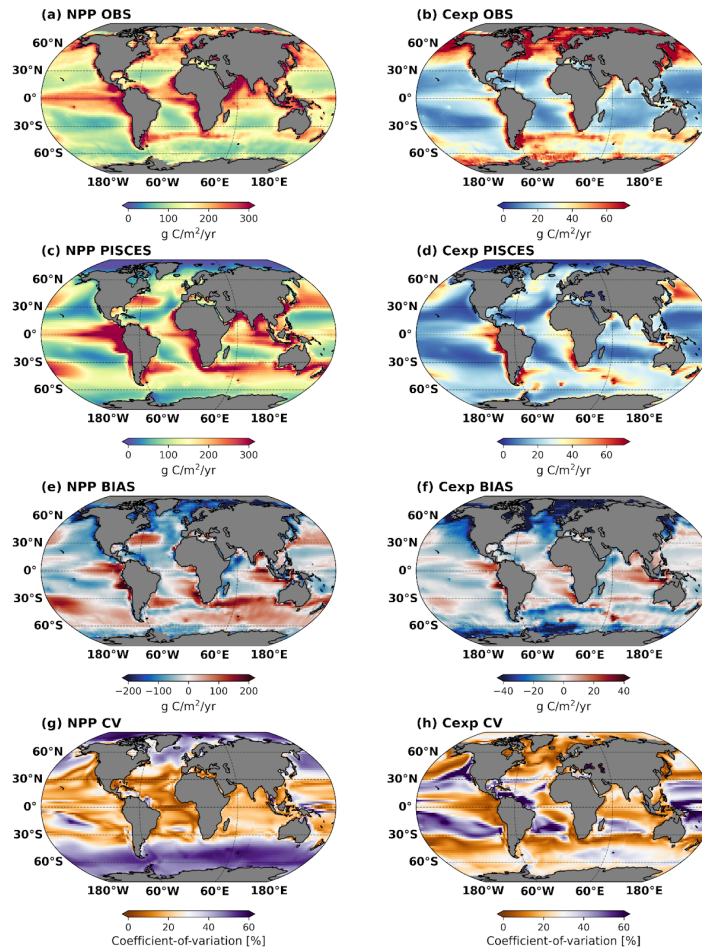

Figure S4: Global maps of satellite derived (a, b) and ensemble model mean (c, d) NPP and  $C_{\text{exp}}$ . Panels (e) and (f) show the multi-model mean minus remote-sensing bias while (g) and (h) are the coefficient of variation (CV) for model NPP and  $C_{\text{exp}}$ , respectively.



125 **S6 Phytoplankton biomass percentage contribution in Quota-based configurations**

126

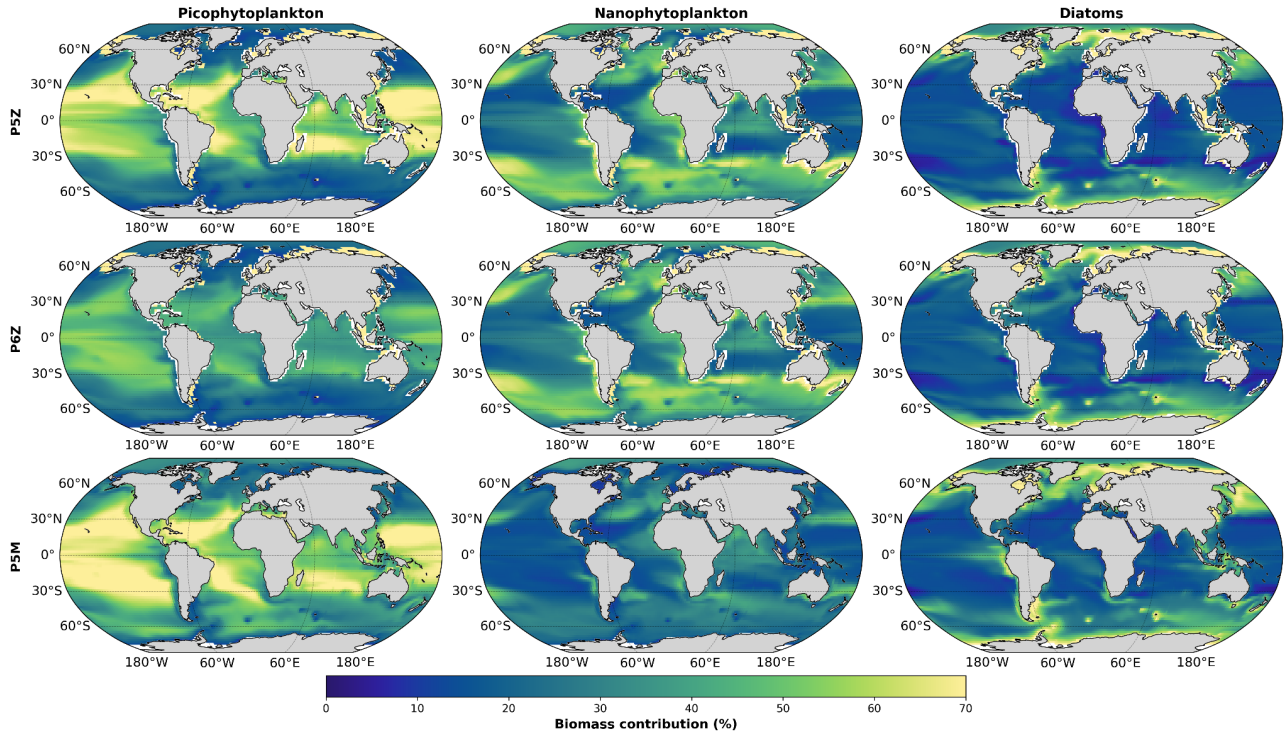

127

128 Figure S5: Percentage mass contribution of pico-, nano, and diatoms to total phytoplankton for the reference  
129 period for the three Quota-based configurations. Note that P6Z shows lower picophytoplankton biomass  
130 because part of the small phytoplankton biomass is allocated to the diazotroph PFT (not shown).

131

132 **S7 Zooplankton dynamics**

133

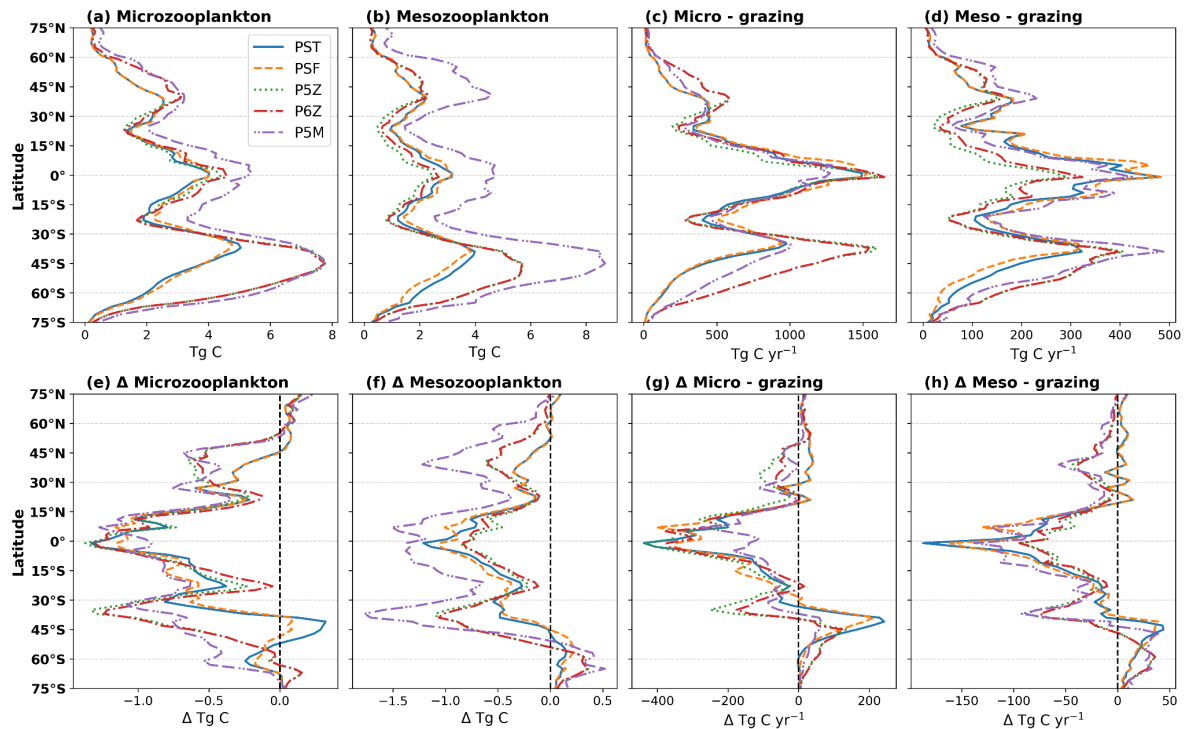

134

135 Figure S6: Top row shows zonally integrated (a) micro- and (b) mesozooplankton biomass along with the  
136 respective grazing rates over the top 100 m. Bottom row (e-h) shows the future shifts

137 **S8 Skill assessment of PISCES configurations versus ensemble mean of remote-sensing**  
138 **NPP and  $C_{exp}$ .**  
139

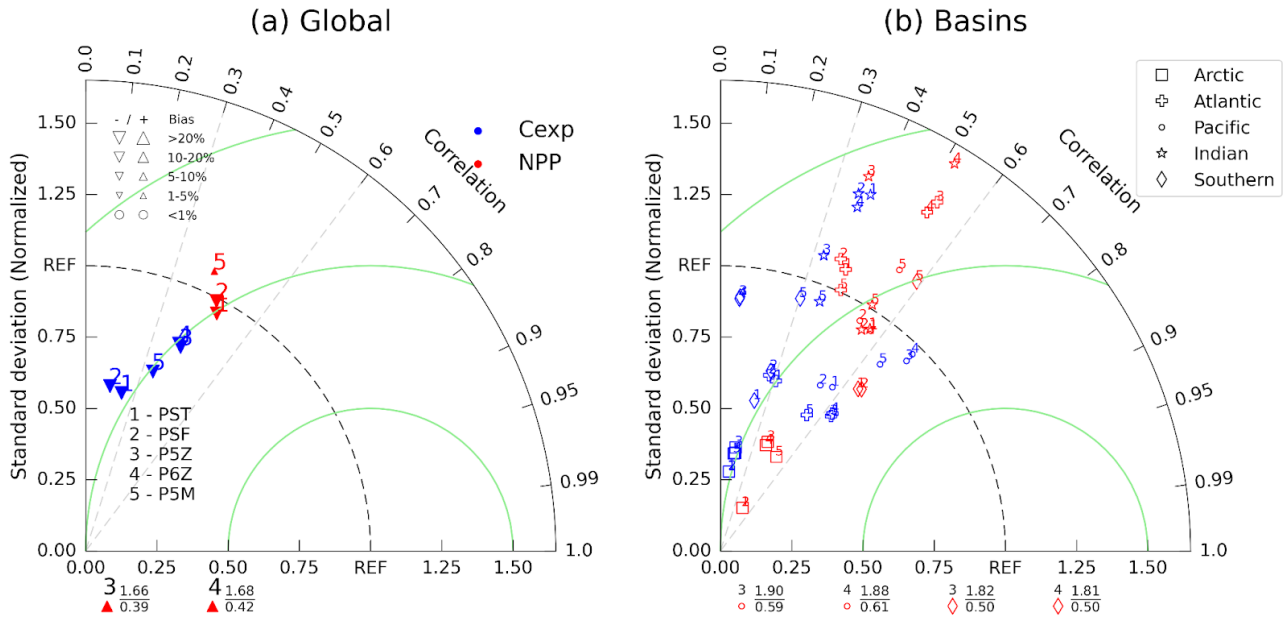

140  
141  
142 Figure S7: Taylor diagrams (Taylor, 2001) showing the (a) global and (b) basin wide performance of the  
143 PISCES configurations compared to remote-sensing. Radial distance represents the ratio of simulated to  
144 remote-sensing standard deviation and azimuthal angle is the model-data correlation. Green arcs show  
145 centered root mean square error between the model and remote-sensing estimates. In (a) and (b), numbers  
146 indicate the PISCES configuration while red and blue points correspond to NPP and  $C_{exp}$ , respectively.  
147 Outlier points are shown beneath the respective panels. Top numbers are the standard deviation and lower  
148 values are the correlation coefficient.

149  
150 **References**

- 151  
152 Fay, A.R., and McKinley, G.A.: Global open-ocean biomes: mean and temporal variability, *Earth Syst. Sci. Data*, 6(2),  
153 273-284, <https://doi.org/10.5194/essd-6-273-2014>, 2014.  
154  
155 Jönsson, B.F., Kulk, G., and Sathyendranath, S.: Review of algorithms estimating export production from satellite  
156 derived properties, *Front.Mar. Sci.*, 10, 1149938, <https://doi.org/10.3389/fmars.2023.1149938>, 2023.  
157  
158 Taylor, K.E.: Summarizing multiple aspects of model performance in a single diagram, *J. Geophys. Res-Atmos.*,  
159 106(D7), 7183-7192, <https://doi.org/10.1029/2000JD900719>, 2001.
